# Supplementary material
Source: PubMed Central journal article supplement (PMC4896478)

# Mapping Multi-Day GPS Data

A Cartographic Study in NYC

Dustin T. Duncan, ScD & Seann D. Regan, MA

**Data Sources:**  
 NYC OpenData,  
 NYC Low-Income Housing,  
 Neighborhoods and Health Study

**Map Projection:**  
 Lambert Conformal Conic  
 NAD 1983, StatePlane New  
 York Long Island

**GPS Device:**  
 QStarz BT-Q100XT

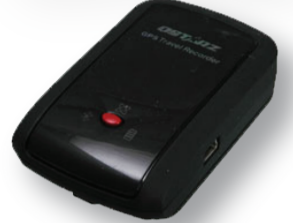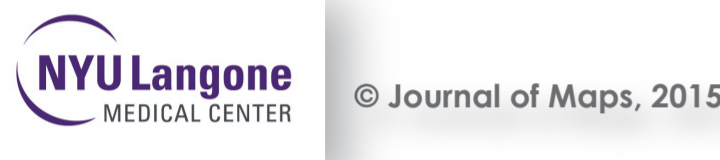

Inset 1: Participant GPS data (density of points weekday)

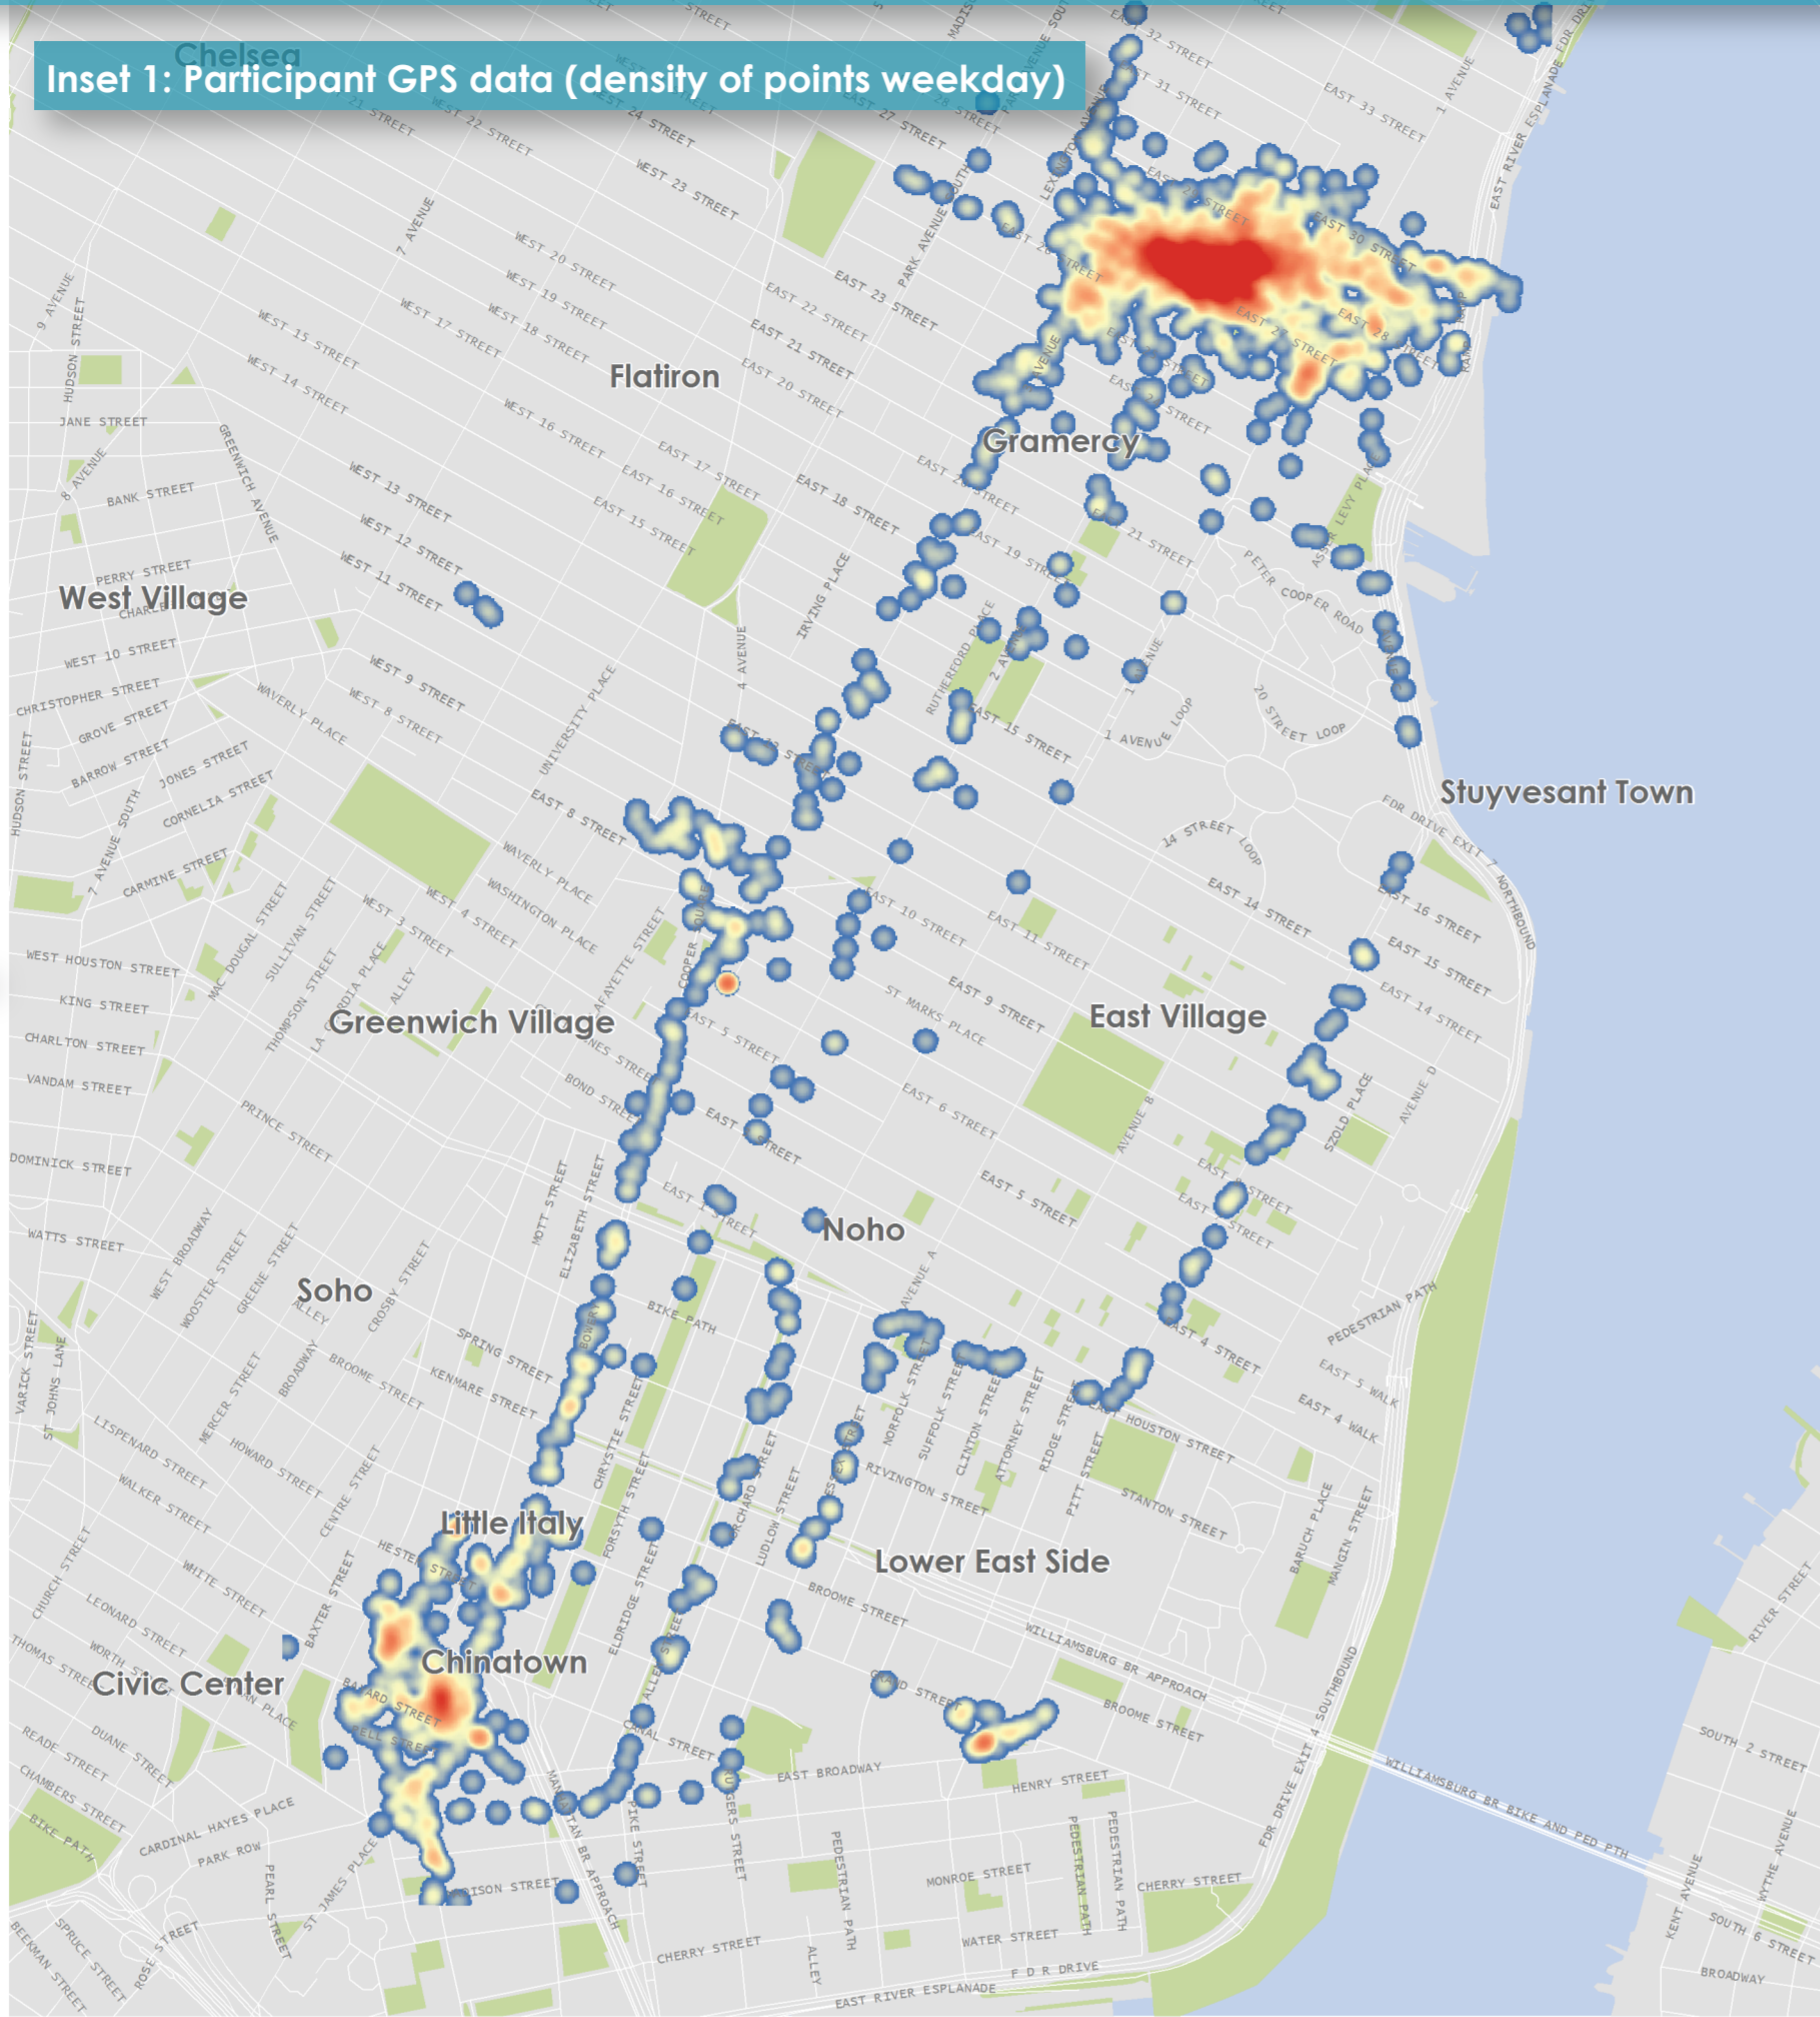

Inset 2: Participant GPS data (density of points weekend)

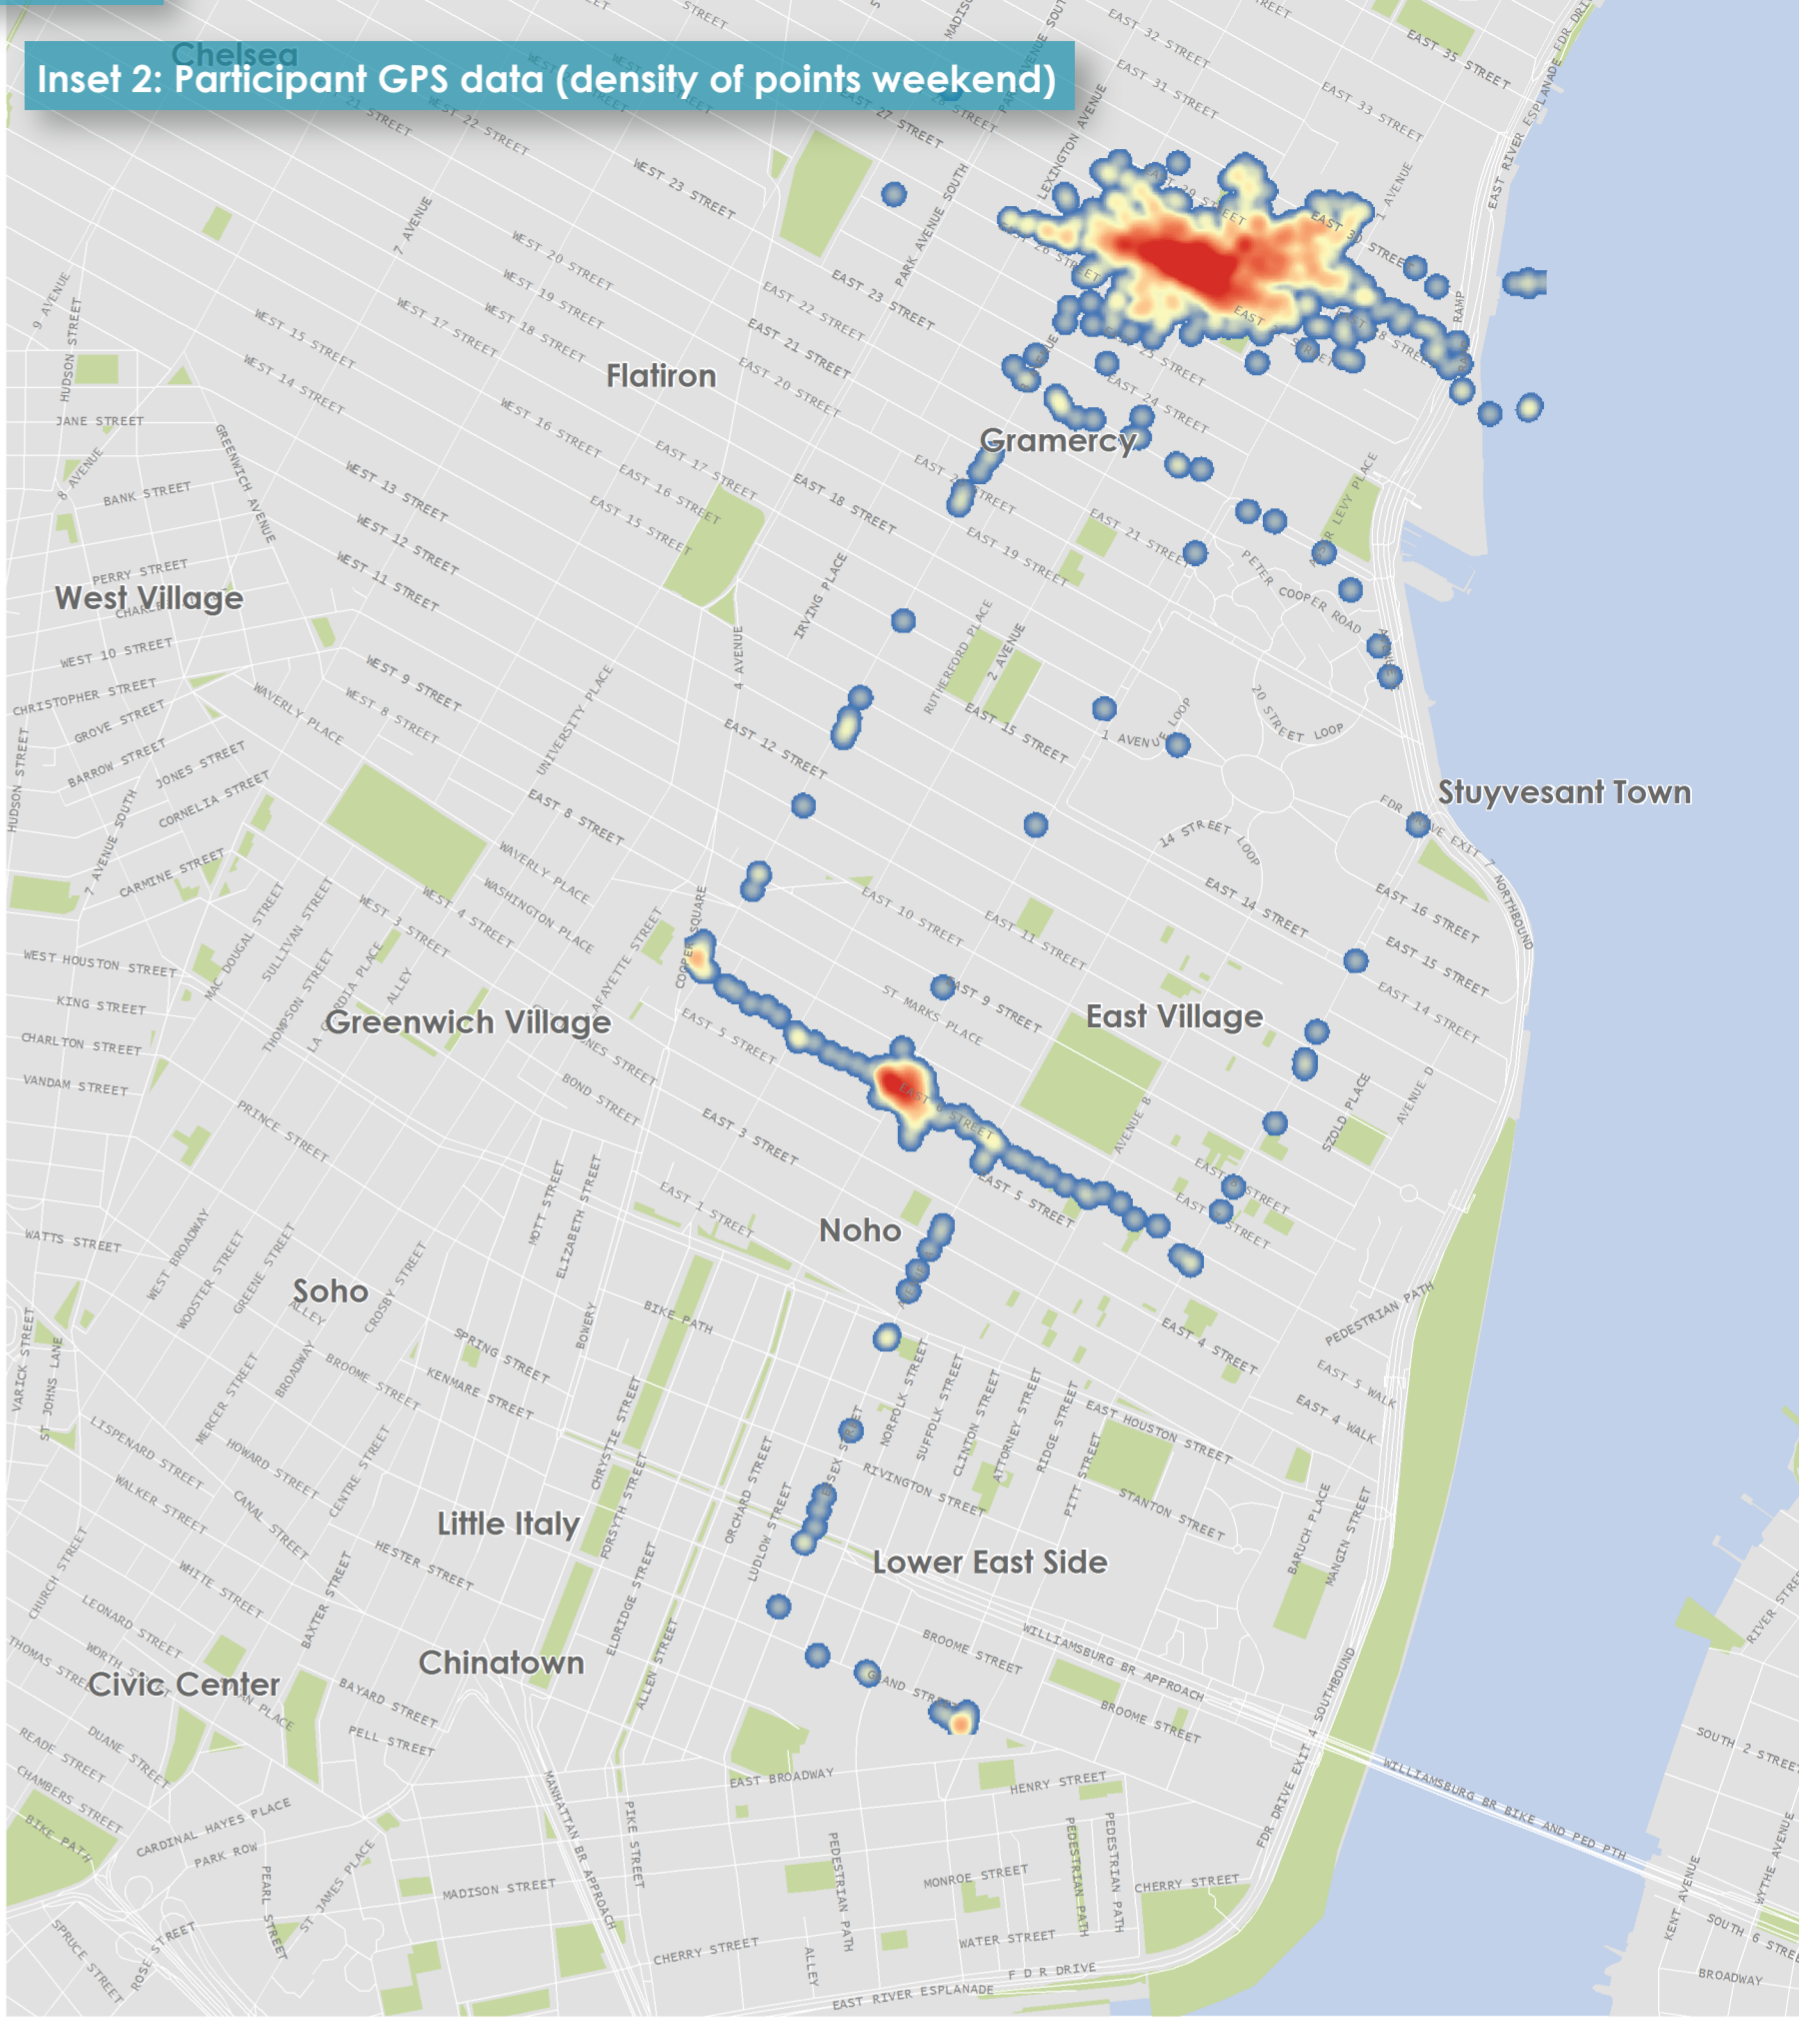

Inset 3: Study location

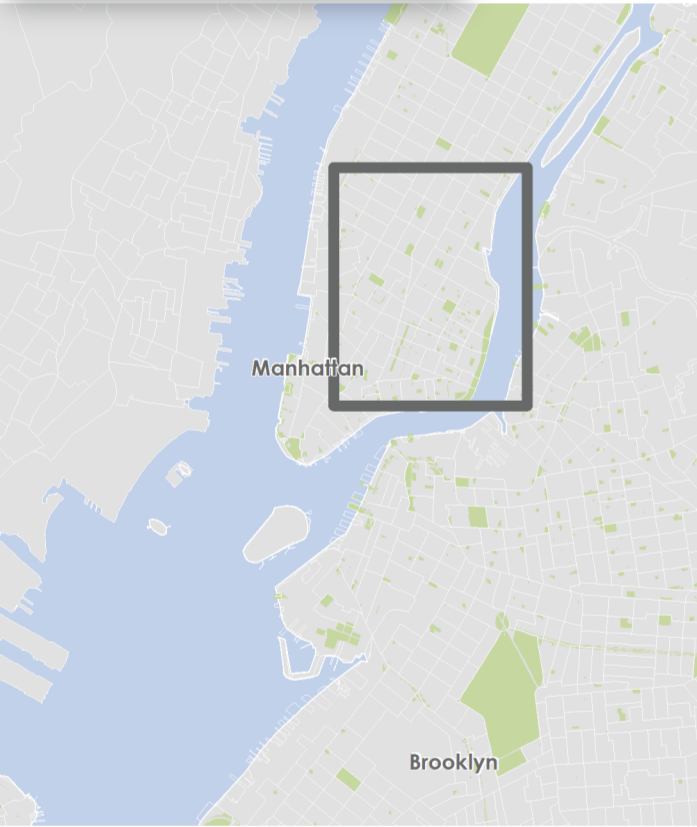

Inset 3: Participant GPS data by day of the week

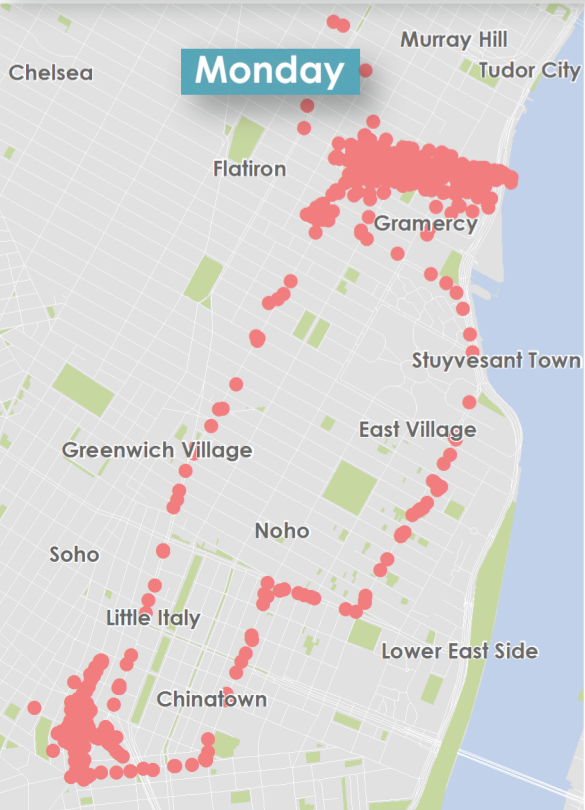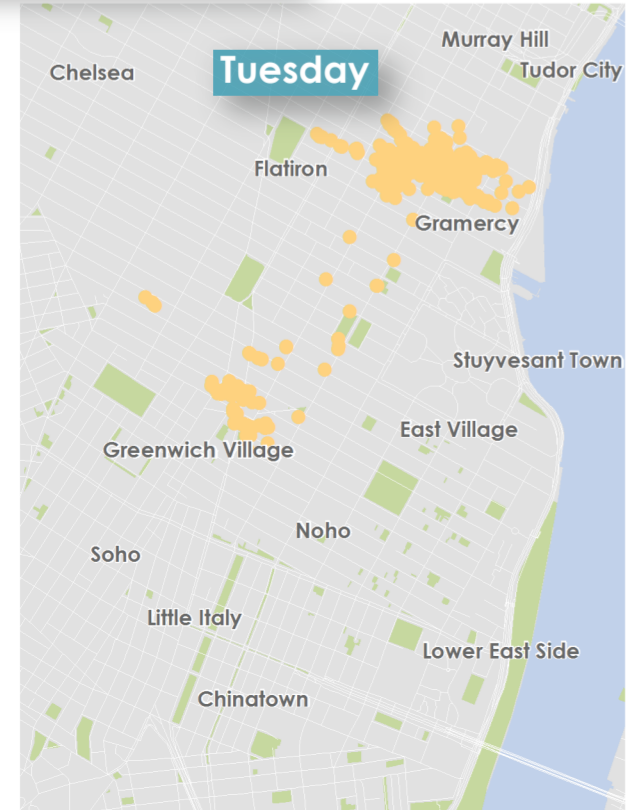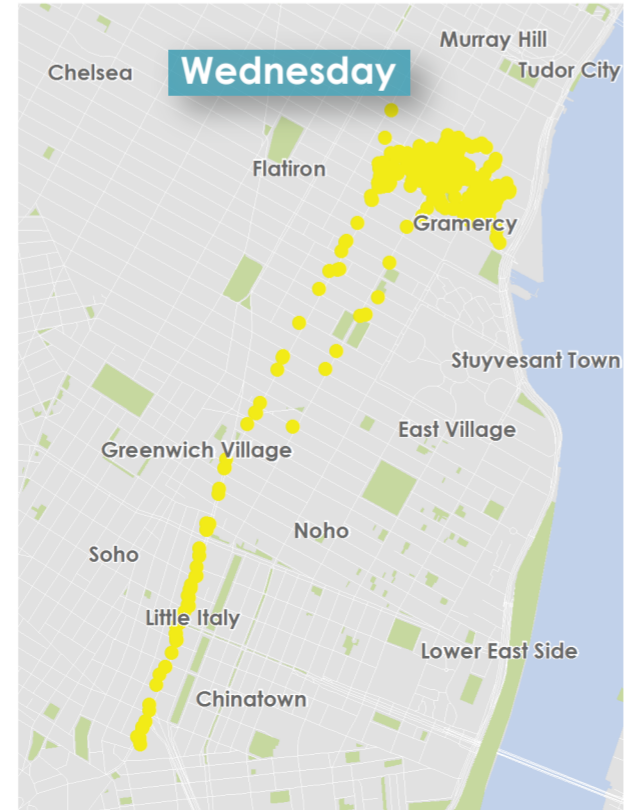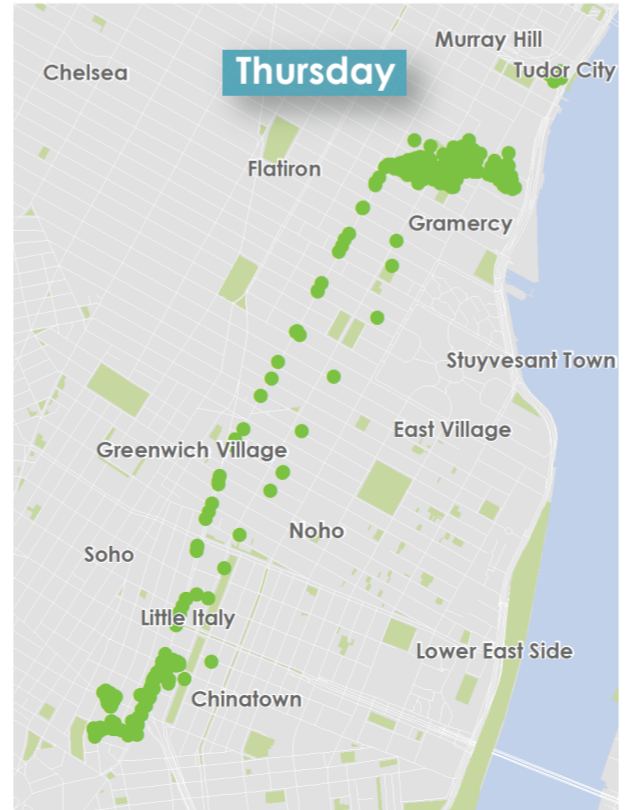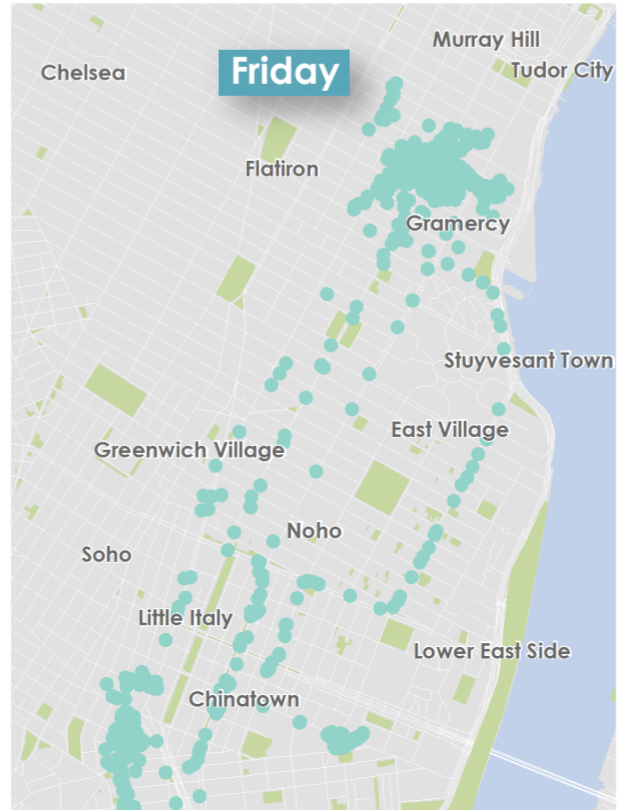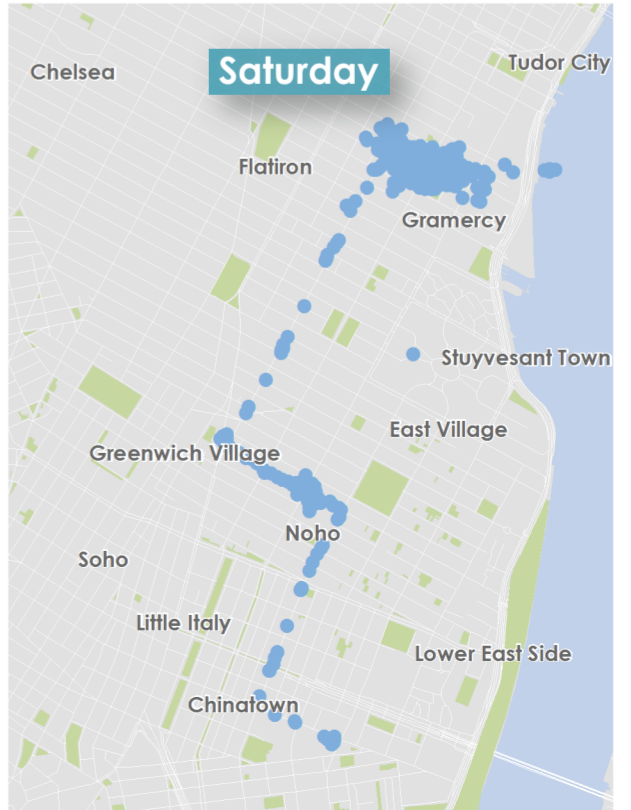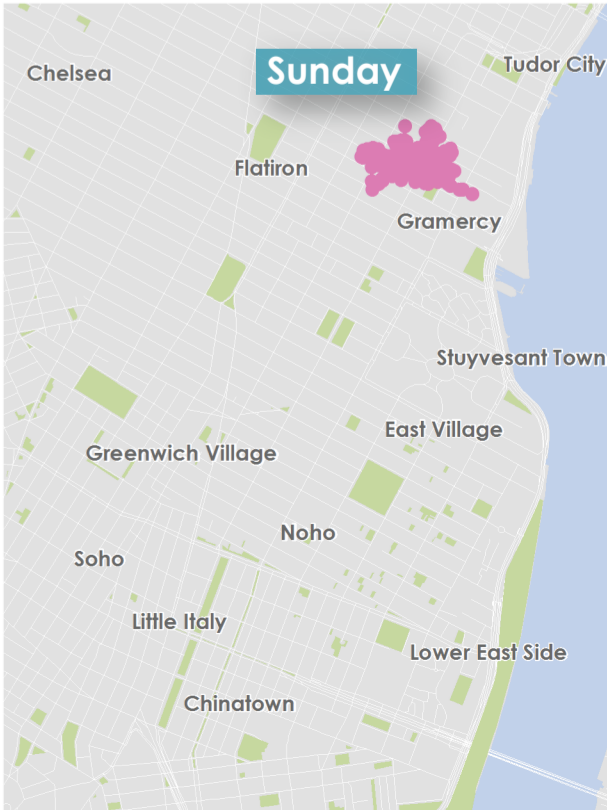

Supplement: NIHMS718221-supplement-Supplementary_Material.pdf [file NIHMS718221-supplement-Supplementary_Material.pdf]
